# Supplementary material for: Neurological manifestations of Allgrove syndrome in patients carrying a potentially founder p.Ser263Pro variant of the AAAS gene
Source: Research Square preprint supplement (doi:10.21203/rs.3.rs-6962259/v1), 2025-07-23
Supplement: Supplementary file 1 [file bdc514d9b97376df33cceb1e.docx]

**Supplementary table 1.** The summary of reported variants in *AAAS* gene and their correlation with the phenotypical features.

| No. | Author | Alteration in  nucleotide  sequence  (NM_015665.5) | Location | Zygosity | Predicted effect  in ALADIN protein  (NP_056480.1) | dbSNP | ClinVar | ACMG classification | Genotype-fenotype correlation | | | | | | | Number of reported cases | References |
| --- | --- | --- | --- | --- | --- | --- | --- | --- | --- | --- | --- | --- | --- | --- | --- | --- | --- |
| Presence of typical symptomps | | | | Other manifestation | Age of onset | Age at examination |
| Alacrimia | Achalasia | | Adrenal insufficiency |
| 1. | Allgrove J.  et al. (1978) | - | - | - | - | - | - | - | + | + | | + | N/A | 4-6 | 4-6 | 4 | [1] |
| 2. | Handschug K. et al. (2001) | c.43C>A | Exon 1 | C H | p.Gln15Lys | rs121918549 | ID: 2735896  (P) | P | + | + | | + | progressive peripheral neuropathy | N/A | N/A | 1  (German origin) | [24] |
| c.787T>C | Exon 8 | p.Ser263Pro | rs121918550 | ID: 5045 (P/LP) | P |
| c.251G>A | Exon 2 | hom. | p.Trp84Ter | rs754637718 | ID: 5048 (P/LP) | P | + | + | | + | - | N/A | N/A | 3  (Polish origin) |
| c.479A>G | Exon 6 | hom. | p.His160Arg | rs1297831120 | ID: 2735892  (P) | LP | + | + | | + | - | N/A | N/A | 1  (Turkish origin) |
| c.470_471delTT | Exon 6 | hom. | p.Phe157CysfsTer16 | - | - | P | + | + | | + | - | N/A | N/A | 2  (Arabian origin) |
| c.787T>C | Exon 8 | hom. | p.Ser263Pro | rs121918550 | ID: 5045 (P/LP) | P | + | + | | + | mental retardation, progressive peripheral neuropathy | N/A | N/A | 2  (Polish origin) |
| c.787T>C | Exon 8 | CH | p.Ser263Pro | rs121918550 | ID: 5045 (P/LP) | P | + | + | | + | progressive peripheral neuropathy | N/A | N/A | 1 (Polish origin) |
| c.1389delC | Exon 15 | p.Phe464SerfsTer87 | - | - | LP |
| c.856C>T | Exon 9 | hom. | p.Arg286Ter | rs145446970 | ID: 1322889 (P) | P | + | + | | + | - | N/A | N/A | 8 (Métis-Canadian origin) |
| c.1024C>T | Exon 11 | hom. | p.Arg342Ter | rs757303233 | ID: 2735885 (P) | P | + | + | | + | - | N/A | N/A | 1 (Moroccan origin) |
| 3. | Houlden H. et al. (2002) | c.43C>A | Exon 1 | C H | p.Gln15Lys | rs121918549 | ID: 2735896  (P) | P | + | + | | + | lower limb weakness | 16 | 48 | 1 | [21] |
| c.1148_1149delCT | Exon 11 | p.Glu383AspfsTer9 | - | - | LP |
| c.787T>C | Exon 8 | C H | p.Ser263Pro | rs121918550 | ID: 5045 (P/LP) | P | + | + | | +++ | lower limb weakness | 12 | 37 | 1 |
| c.1273insA | Exon 14 | p.Pro426ThrfsTer15 | - | - | LP |
| c.43C>A | Exon 1 | C H | p.Gln15Lys | rs121918549 | ID: 2735896  (P) | LP | ++ | + | | + | N/A | 6 | 36 | 2 |
| c.1186insC | Exon 12 | p. Glu398ArgfsTer28 | - | - | LP | ++ | +++ | | ++ | N/A | 3 | 39 |
| c.1226_1229delTCTG | Exon 13 | C H | p.Glu409ValfsTer6 | - | - | LP | ++ | ++ | | ++ | hypoglycaemic seizures | 8 | 18 | 1 |
| c.1421G>A | Exon 16 | p.Trp474Ter | rs2121080376 | - | VUS/LP |
| c.292delC | Exon 2 | C H | p. Asn98ThrfsTer10 | - | - | LP | + | +++ | | ++ | hypoglycaemic seizures | 4 | 32 | 2 |
| c.688C>T | Exon 7 | p.Arg230Ter | rs758057774 | ID: 841221 (P) | P | + | ++ | | ++ | - | 3 | 30 |
| c.938T>C | Exon 10 | hom. | p.Val313Ala | rs773601814 | ID: 202169  (LP) | VUS/LP | ++ | + | | +++ | lower limb weakness | 25 | 35 | 1 |
| 4. | Kimber J. et al. (2003) | c.464G>A | Exon 6 | C H | p.Arg155His | rs758440592 | ID: 872168  (P/LP) | P | + | ++ | | - | progressive muscular weakness, gait ataxia, optic atrophy | 5 | 40 | 3 | [8] |
| c.971G>A | Exon 10 | p.Trp324Ter | - | - | LP | + | ++ | | - | paraesthesiae, mild palatal weakness, gait disturbance, *pes cavus* | 20 | 45 |
| N/A | +++ | | - | gait disturbance, ptosis, gait ataxia | N/A | 60 |
| 5. | Prpic I. et al. (2003) | c.43C>A | Exon 1 | C H | p.Gln15Lys | rs121918549 | ID: 5044 (P) | P | ++ | +++ | | + | autonomous and central nervous system abnormalities, tall stature (>95 percentile), abnormal heart reflexes, cutis anserina, postural hypotension | 1.8 | 1.8 | 1 | [20] |
| c.787T>C | Exon 8 | p.Ser263Pro | rs121918550 | ID: 5045 (P/LP) | P |
| c.1159C>T | Exon 12 | C H | p.Gln387Ter | rs763820204 | ID: 264990 (P) | P | + | + | | + | hyperreflexia, muscle weakness, ataxia, fissured palms | 7.5 | 7.5 | 1 |
| c.787T>C | Exon 8 | p.Ser263Pro | rs121918550 | ID: 5045 (P/LP) | P |
| c.787T>C | Exon 8 | hom. | p.Ser263Pro | rs121918550 | ID: 5045 (P/LP) | P | - | +++ | | - | recurrent vomiting, hyperreflexia, muscle atrophy, positive Babinski sign, ataxia, fissured palms, abnormal histamine test | 10 | 10 | 3 |
| 6. | Milenković et al.  (2008) | c.1261_1262insG | Exon 14 | C H | p.Val421GlyfsTer5 | rs1164422092 | - | LP | +++ | +++ | | + | dysphagia, cutaneous hyperpigmentation, elevated plasma ACTH, palmoplantar hyperkeratosis, poor coordination, hyperreflexia | 6 | 12 | 3 (Serbian origin) | [26] |
| c.787T>C | Exon 8 | p.Ser263Pro | rs121918550 | ID: 5045 (P/LP) | P | +++ | + | | - | mild dysphagia, hyperreflexia, convergent squint | 1.5 | 5 |
| +++ | - | | - | - | - | 3.5 |
| c.787T>C | Exon 8 | hom. | p.Ser263Pro | rs121918550 | ID: 5045 (P/LP) | P | +  7/8 | +  8/8 | | +/-  5/8 | Muscle wasting, hyperreflexia, ataxia (5/8) | 0-10 | 2-22 | 17 (12/17- Slavic origin) |
| 7. | Nakamura K. et al. (2010) | c.464G>A | Exon 6 | hom. | p.Arg155His | rs758440592 | ID: 872168  (P/LP) | P | + | +++ | | N/A | gait disturbance, limb muscle weakness, optic atrophy | 40 | 60 | 1 | [34] |
| 8. | Razavi Z. et al. (2010) | N/A | N/A | N/A | N/A | - | - | - | + | - | | + | loss of permanent teeth, neurological disturbances, mild developmental delay | 13 | N/A | 4 | [35] |
| + | + | | - | 15 |
| + | + | | + | 6 |
| + | - | | + | 10 |
| 9. | Dumić (2011) | c.887C>A | Exon 9 | CH | p.Ser296Tyr | - | - | LP | ++ | - | | +++ | delayed developmental milestones and neurological dysfunctions, gait disturbance, motor and sensory impairment, hyperkeratosis of palms | N/A | 3.5, 5.5 | 2 (Croatian origin) | [25] |
| c.787T>C | Exon 8 | p.Ser263Pro | rs121918550 | ID: 5045 (P/LP) | P |
| Dumić (2012) | c.787T>C | Exon 8 | CH | p.Ser263Pro | rs121918550 | ID: 5045 (P/LP) | P | ++ | +/- | | ++ | mental retardation, postural hypotension, anisocoria, xerostomia, osteoporosis | N/A | 6, 2 | 2 (Croatian origin) | [22] |
| c.43C>A | Exon 1 | p.Gln15Lys | rs121918549 | ID: 2735896 (P) | P |
| c.787T>C | Exon 8 | hom. | p.Ser263Pro | rs121918550 | ID: 5045 (P/LP) | P | +++ | ++ | | ++ | mild mental retardation, brisk tendon reflexes, xerostomia, nasal speech, palmoplantar hyperkeratosis, vomiting, exhaustion, hyperpigmentation, hypoglycaemia and late manifestations: severe motor and sensory neuropathy, muscle weakness, optic atrophy, postural hypotension | 5 | 5 | 1 (Croatian origin) |
| c.43C>A | Exon 1 | C H | p.Gln15Lys | rs121918549 | ID: 2735896 (P) | P | ++ | ++ | | ++ | decreased sweating, brisk tendon and absent ankle reflexes, xerostomia, osteoporosis | N/A | 7, 8 | 2 (Croatian origin) | [22] |
| c.1159C>T | Exon 12 | p.Gln387Ter | rs763820204 | ID: 264990 (P) | P |
| c.1159C>T | Exon 12 | hom. | p.Gln387Ter | rs763820204 | ID: 264990 (P) | P | +++ | ++ | | - | growth delay, xerostomia, cutis anserina, palmoplantar hyperkeratosis, nasal speech, muscle atrophy, gait disturbances | 11 | 11 | 1 (Croatian origin) |
| 10. | Kilicli F. et al. (2012) | N/A | N/A | N/A | N/A | - | - | - | ++ | +++ | | +++ | hyperpigmentation of the scar tissue, adrenal crisis triggered by infection of urinary system | 15 | 23 | 1 | [36] |
| 11. | Bizzarri C. et al. (2013) | c.1142T>G | Exon 12 | hom. | p.Leu381Arg | rs1291747172 | - | VUS/LP | N/A | +++ | | +++ | muscle weakness, gait ataxia, type 1 Chiari malformation, syringomyelia and multiple spinal cord abnormalities, hyperpigmentation of elbows | 2 | 13 | 1 | [37] |
| 12. | Sanyal D.  et al.(2013) | N/A | N/A | N/A | - | - | - | - | ++ | ++ | | +++ | hyperpigmentation of skin, autonomic and peripheral neuropathy, postural hypotension | 20 | 22 | 1 | [38] |
| 13. | Alakeel A. et al. (2015) | c.1331+1G>A | Intron 14 | hom. | p.? | rs150511103 | ID: 264994  (P) | P | +++ | ++ | | +++ | oral hyperpigmentation,  dry-eye syndrome | 4 | 4 | 1 | [39] |
| 14. | Derrar R. et al. (2015) | N/A | N/A | N/A | - | - | - | - | +++ | ++ | | ++ | keratitis, corneal damage | 4 | N/A | 3 | [40] |
| ++ | +++ | | ++ | 7 |
| +++ | ++ | | ++ | 5 |
| 15. | Misgar RA. et al. (2015) | N/A | N/A | N/A | - | - | - | - | +++ | ++ | | +++ | severe motor polyneuropathy, generalized weakness, hyperpigmentation of skin | 8 | 18 | 1 | [41] |
| 16. | Li W. et al. (2015) | c.771delG | Exon 8 | hom. | p.Arg258GlyfsTer33 | rs1184877278 | ID: 2735886  (P) | P | +++ | ++ | | +++ | hyperpigmentation of skin, fatigue, seizures | 4, 2 | 7, 3 | 2 | [42] |
| c.1366C>T | Exon 15 | hom. | p.Gln456Ter | rs2121081089 | - | LP | ++ | +++ | | +++ | 2 | 5 | 1 |
| 17. | Brown B. et al. (2016) | c.57_58delCA | Exon 1 | C H | p.Tyr19_Glu20delinsTer | rs552637666 | ID: 264988  (P) | P | + | +++ | | ++ | hyperpigmentation of the buccal mucosa, gastroesophageal reflux | 5 | 6 | 1 | [9] |
| c.526dupC | Exon 6 | p.Arg176ProfsTer4 | rs1486537681 | - | LP |
| 18. | Jerie M. et al. (2016) | c.43C>A | Exon 1 | C H | p.Gln15Lys | rs121918549 | ID: 2735896  (P) | P | ++ | +++ | | ++ | gait disturbance, fatigue after long distances walks, dysphagia, muscle cramps, hyperpigmentation of the skin | late childhood | 36 | 1 | [43] |
| c.464G>A | Exon 6 | p.Arg155His | rs758440592 | ID: 872168  (P/LP) | P |
| 19. | Kallabi F. et al. (2016) | c.1331+1G>A | Intron 14 | hom. | p.? | rs150511103 | ID: 264994  (P) | P | At least 2 of 3 typical symptoms | | | | seizures, neurological symptoms | childhood | 1-10 | 25 | [44] |
| c.856C>T | Exon 9 | hom. | p. Arg286Ter | rs145446970 | ID: 1322889  (P) | P | 1 |
| 20. | Vahedi M. et al. (2016) | N/A | N/A | N/A | - | - | - | - | + | | +++ | +++ | loss of teeth, weight loss | childhood | 15 | 2 | [45] |
| 21. | van Tellingen V.et al (2016) | c.1331+1G>A | Intron 14 | hom. | p.? | rs150511103 | ID: 264994  (P) | P | + | | +++ | +++ | neurological symptoms, congenital hypothyroidism, hyperpigmentation of the skin | 2 | 4 | 1 | [46] |
| 22. | Shah SWH et al. (2017) | N/A | N/A | N/A | - | - | - | - | ++ | | + | + | hyperpigmentation of the skin, poor apetite, hypoglycaemic episodes, | childhood | 8, 12 | 2 | [11] |
| 23. | Berrani H. et al. (2018) | c.1331+1G>A | Intron 14 | hom. | p.? | rs150511103 | ID: 264994  (P) | P | ++ | | + | +++ | anorexia, vomiting, generalized hyperpigmentation of the skin, partial loss of primary dentition | 1 year,  9 months | 5, 3.5 | 2 | [47] |
| 24. | de Freitas MRG.  et al. (2018) | c.938T>C | Exon 10 | C H | p.Ala313Val | rs773601814 | ID: 202169  (LP) | VUS/LP | +++ | | +++ | ++ | weakness, difficulty  in speech, orthostatic hypotension, amyotrophy  of limbs | alacrimia since childhood | 25 | 1 | [48] |
| c.1144_1147delTCTG | Exon 12 | p. Ser382ArgfsTer33 | rs770214071 | ID: 264993  (P/LP) | P |
| 25. | Kurnaz E. et al. (2018) | c.1264_1273del | Exon 14 | hom. | p.Gln422AsnfsTer126 | rs2121082201 | ID: 2584864 (P) | P | At least 2 of 3 typical symptoms- usually alacrimia and adrenal insufficiency | | | | neurologic disorders, seizures | childhood | 3-7,5 | 6 | [49] |
| 26. | Nakamura J. et al (2018) | N/A | N/A | N/A | N/A | N/A | N/A | N/A | + | | +++ | + | difficulty swallowing, neurologic disease | adulthood | 31 | 1 | [50] |
| 27. | Akram S. et al. (2018) | N/A | N/A | N/A | N/A | N/A | N/A | N/A | ++ | | +++ | ++ | mild degree of hearing loss, episodic hypertension | Since birth | 7 | 1 | [51] |
| 28. | Lu C. et al. (2019) | c.1331+1G>A | Intron 14 | hom. | p.? | rs150511103 | ID: 264994  (P) | P | +++ | | ++ | +++ | hypoglycemia, mild learning difficulty | Since infancy | 3 | 1 | [52] |
| 29. | Bitetto G. et al. (2019) | c.464G>A | Exon 6 | hom. | p.Arg155His | rs758440592 | ID: 872168  (P/LP) | P | ++ | | ++ | +++ | motor neuron disease, progressive gait impairment cerebellar ataxia, autonomic dysfunction, slight tongue atrophy | 47 | 75 | 1 | [53] |
| 30. | Gupta S. et al. (2020) | c.762delC | Exon 8 | hom. | p. Ser255ValfsTer36 | rs746057093 | ID: 1323789 (P/LP) | P | ++ | | ++ | ++ | darkening  of lips, hyperkeratosis | since early onfancy | 2,5 | 1 | [54] |
| 31. | Polat R.  et al. (2019) | 398_399+2del | Exon 4 | hom. | p.? | - | - | P | At least 2 of 3 typical symptoms: alacrimia: 23/23  Achalasia: 13/23  Adrenal insufficiency: 18/23 | | | | hyperpigmentation of the skin, short stature, vomiting | N/A | N/A | 23 (from 14 families) | [55] |
| 32. | Zheng H.  et al. (2020) | N/A | N/A | N/A | N/A | N/A | N/A | N/A | ++ | | +++ | N/A | chronic cough | since birth | 3 | 1 | [56] |
| 33. | Yadav P.  et al. (2020) | N/A | N/A | N/A | N/A | N/A | N/A | N/A | ++ | | ++ | ++ | darkening of the skin, difficulty in walking | childhood | 18 | 1 | [57] |
| 34. | Jabbour S.  et al. (2020) | N/A | N/A | N/A | N/A | N/A | N/A | N/A | ++ | | +++ | ++ | anisocoria, bilateral optic nerve atrophy | childhood | 12 | 1 | [58] |
| 35. | Rizzo R. et al. (2020) | N/A | N/A | N/A | N/A | N/A | N/A | N/A | ++ | | +++ | ++ | malnutrition, persistent vomiting | early childhood | 7 | 1 | [59] |
| 36. | Vezzoli V. et al. (2020) | c.765dupT | Exon 8 | C H | p.Gly256Trp fsTer67 | - | - | LP | ++ | | ++ | +++ | autonomic dysfunctions, muscle weakness, weight loss, fatigue | childhood | 18, 14, 4 | 3 | [30] |
| c.997–2A>G | Intron 11 | p.? | - | - | LP |
| 37. | Jayant SS. et al. (2021)  Volkova NI et al. (2020) | c.43C>A | Exon 1 | hom. | p.Gln15Lys | rs121918549 | ID: 2735896  (P) | LP | +++ | | ++ | ++ | distal spinal muscle amyotrophy | early childhood | 19, 14 | 2 | [60]  [61] |
| 38. | Miyazawa H. et al. (2021) | c.934C>T | Exon 9 | C H | p.Arg312Ter | rs121918547 | ID: 5039 (P/LP) | P | + | | ++ | +++ | muscle weakness, tongue atrophy | childhood | 38 | 1 | [62] |
| c.881delT | Exon 9 | p.Leu294ProfsTer59 | - | - | LP |
| 39. | Alhassoun M. et al. (2021) | N/A | N/A | hom. | N/A | N/A | N/A | N/A | ++ | | +++ | ++ | chronic diarrhea, abdominal pain, vomiting, easy fatiguability | childhood | 16 | 1 | [63] |
| 40. | Rivera-Suazo Y. et al. (2021) | N/A | N/A | N/A | N/A | N/A | N/A | N/A | ++ | | +++ | ++ | perinatal hypoxia, malnutrition, vomiting | since birth | 2 | 1 | [64] |
| 41. | Weiman DI  et al. (2021) | c.1140_1162del | Exon 12 | C H | p.Leu381ThrfsTer4 | - | - | LP | ++ | | ++ | ++ | progressive spasticity, peripheral neuropathy | childhood | 11 | 1 | [65] |
| c.57_58del | Exon 1 | p.Tyr19_Glu20delinsTer | rs552637666 | ID: 264988 (P) | P |
| 42. | AlOmran HA. et al. (2021) | c.885G>A | Exon 9 | hom. | p.Trp295Ter | rs766542823 | ID: 429876 (P) | P | +++ | | ++ | +++ | poor feeding, vomiting, lethargy, hyperpigmentation | since birth | 1 | 1 | [66] |
| 43. | Hanino N.  et al. (2021) | N/A | N/A | N/A | N/A | N/A | N/A | N/A | +++ | | +++ | ++ | general fatigue, muscular atrophy, poor apetite, weight loss | childhood | 18 | 1 | [67] |
| 44. | Kronenberg G. et al. (2021) | N/A | N/A | N/A | N/A | N/A | N/A | N/A | ++ | | +++ | ++ | gait disturbance, hyperpigmentation, mild intellectual disability | adulthood | 42 | 1 | [68] |
| 45. | Agarwal A. et al. (2021) | c.43C>A | Exon 1 | hom. | p.Gln15Lys | rs121918549 | ID: 2735896  (P) | LP | ++ | | +++ | ++ | muscle weakness, orthostatic hypotension | adulthood | 46 | 1 | [69] |
| 46. | Botella Garcia J. et al. (2022) | N/A | N/A | N/A | N/A | N/A | N/A | N/A | +++ | | ++ | - | optic atrophy, photophobia | adulthood | 37 | 1 | [70] |
| 47. | Soares MC et al. (2022) | N/A | N/A | C H | N/A | N/A | N/A | P | +++ | | +++ | +++ | amyotrophy, gait impairment, global  weakness, *pes cavus* | childhood | 25 | 1 | [71] |
| 48. | Macke EL et al. (2022) | c.211delC | Exon 2 | C H | p.His71IlefsTer23 | rs765577880 | ID: 2575044 (P) | P | +++ | | +++ | - | seizures, optic atrophy, muscle weakness | Childhood | 29 | 1 | [72] |
| c.809G>C | Exon 8 | p.Arg270Pro | - | - | VUS |
| 49. | Eid M.  et al. (2022) | N/A | N/A | N/A | N/A | N/A | N/A | N/A | ++ | | ++ | +++ | short stature, feeding difficulties, recurrent vomiting, hyperpigmentation | childhood | 8 | 1 | [73] |
| 50. | Alhalabi M  et al. (2022) | N/A | N/A | N/A | N/A | N/A | N/A | N/A | +++ | | ++ | +++ | short stature, alacrimia since early childhood | 1 | 16 | 1 | [74] |
| 51. | Bitetto G. et al. (2023) | c.464G > A | Exon 6 | hom. | p.Arg155His) | rs758440592 | ID: 872168  (P/LP) | P | +++ | | ++ | ++ | gait impairment, severe polyneuropathy, hypoglycaemia, loss of consciousness and hypotensive episodes | 47 | N/A | 1 | [75] |
| 52. | Vigano' M  et al. (2023) | c.464G>A | Exon 6 | hom. | p.Arg155His | rs758440592 | ID: 872168  (P/LP) | P | + | | +++ | + | dysphagia, weight loss, dyspnea, dysarthia, | adulthood | 67 | 1 | [76] |
| 53. | Naseer A. et al. (2024) | N/A | N/A | N/A | N/A | N/A | N/A | N/A | +++ | | ++ | ++ | weight loss, weakness, generalized hyperpigmentation | childhood | 17 | 1 | [29] |
| 54. | Yidrym (2024) | c.1066_1067delC | Exon 11 | hom. (6 patients) | p.Leu356fsTer8 | rs763216820 | ID: 264992 (P) | P | +++ (12/12) | | ++ (10/12) | ++ (10/12) | muscle weakness (8/12), multiple dental caries (9/12) delayed walking (7/12), excessive sweating (7/12), delayed speech (6/12) | Neonatal (alacrimia 12/12) | 0.5-7.2 | 12 | [12] |
| c.1432C>T | Exon 16 | hom. (2 patients) | p.Arg478Ter | rs121918548 | ID: 5040 (P) | P |
| c.1250-1G>A | Intron 14 | hom. (1 patient) | p.? | - | - | LP |
| c.398_399+2del | Intron 4 | hom. (1 patient) | p.? | - | - | LP |
| c.688C>T | Exon 7 | hom. (1 patient) | p.Arg230Ter | rs758057774 | ID: 841221 (P) | P |
| c.1368_1372del | Exon 15 | hom. (1 patient) | p.Gln456fsTer38 | - | - | LP |
| 55. | Gupta S.  et al. (2024) | c.43C>A | Exon 1 | hom. | p.Gln15Lys | rs121918549 | ID: 2735896  (P) | LP | ++ | | ++ | +++ | generalized hyperpigmentation of skin, difficulty in walking, tongue atrophy | 5 | 12 | 2 | [77] |
| c.312dupA | Exon 4 | C H | p.Glu105Ter | rs1445679804 | - | LP | ++ | | ++ | +++ | 7 | 11 |
| c.307+4_307+7del | Intron 3 | p.? | rs760630667 | - | VUS |
| 56. | Cehic M.  et al. (2024) | c.787T>C | Exon 8 | C H | p.Ser263Pro | rs121918550 | ID: 5045 (P/LP) | P | ++ | | ++ | ++ | muscle hypotonia, generalized muscle weakness, developmental delay, weight loss, feeding problems, pale skin with hyperpigmentation in lumbar region, abdominal distension, urinary tract infections | 0.9 | 0.9 | 1 | [78] |
| c.1159C>T | Exon 12 | p.Gln387Ter | rs763820204 | ID: 264990 (P) | P |
| 57. | Maaloul I. et al (2025) | c.1331+1G>A | Intron 14 | hom.  (14 patients) | p.? | rs150511103 | ID: 264994  (P) | P | +++ (15/15) | | ++ (10/15) | + (7/15) | Hyperpigmentation (15/15),  neurological symptoms (9/15) | 0-11 | 1-11 | 15 | [79] |
| c.856C>T | Exon 9 | hom.  (1 patient) | p. Arg286Ter | rs145446970 | ID: 1322889  (P) | P |

**Legend (Table 1.)**: het. – heterozygous, hom.- homozygous, C H- compound heterozygote, N/A- not available, + - mild, ++ - moderate, +++ - severe/ borderline abnormal, VUS- Variant of Uncertain Significance, LP- likely pathogenic, P-pathogenic. The cases carrying p.Ser263Pro variants are marked in blue.
