# Supplementary material for: Neurological manifestations of Allgrove syndrome in patients carrying a potentially founder p.Ser263Pro variant of the AAAS gene
Source: Research Square preprint supplement (doi:10.21203/rs.3.rs-6962259/v1), 2025-07-23
Supplement: Supplementary file 2 [file e86372bd04e070ed6f6df2fd.docx]

**Supplementary table 2.** Pathogenic and likely pathogenic variants in *AAAS* gene described
in scientific reports.

| Location | Variant in *AAAS* gene  (NM_015665.5) | Predicted change  in ALADIN protein | ACMG classificaton | References |
| --- | --- | --- | --- | --- |
| Exon 1 | c.43C>A | p.Gln15Lys | Pathogenic | [20-22], [24], [43], [60-61], [69],[77] |
| c.57_58del | p.Tyr19_Glu20delinsTer | Pathogenic | [9], [65] |
| Exon 2 | c.211del | p.His71IlefsTer23 | Pathogenic | [72] |
| c.251G>A | p.Trp84Ter | Pathogenic | [24] |
| c.292delC | p. Asn98ThrfsTer10 | Likely pathogenic | [21] |
| Exon 3 | - |  |  |  |
| Intron 3 | c.307+4_307+7del | p.? | Likely pathogenic/VUS | [77] |
| Exon 4 | c.312dup | p.Glu105Ter | Likely pathogenic | [77] |
| Intron 4 | c.398_399+2del | p.? | Likely pathogenic | [12] |
| Exon 5 | - | - | - |  |
| Exon 6 | c.464G>A | p.Arg155His | Pathogenic | [8], [34], [43], [53], [76] |
| c.470_471del | p.Phe157CysfsTer16 | Pathogenic | [24] |
| c.479A>G | p.His160Arg | Likely pathogenic | [24] |
| c.526dup | p.Arg176ProfsTer4 | Likely pathogenic | [9] |
| Exon 7 | c.688C>T | p.Arg230Ter | Pathogenic | [12], [21] |
| Exon 8 | c.762del | p. Ser255ValfsTer36 | Pathogenic | [54] |
| c.771del | p.Arg258GlyfsTer33 | Pathogenic | [42] |
| c.765dup | p.Gly256Trp fsTer67 | Likely pathogenic | [30] |
| c.787T>C | p.Ser263Pro | Pathogenic | [20-22, 24-26], [78] |
| c.809G>C | p.Arg270Pro | Likely pathogenic/VUS | [72] |
| Exon 9 | c.856C>T | p.Arg286Ter | Pathogenic | [24], [44], [79] |
| c.881del | p.Leu294ProfsTer59 | Likely pathogenic | [62] |
| c.885G>A | p.Trp295Ter | Pathogenic | [66] |
| c.887C>A | p.Ser296Tyr | Likely pathogenic | [25] |
| c.934C>T | p.Arg312Ter | Pathogenic | [62] |
| Exon 10 | c.938T>C | p.Val313Ala | VUS/Likely pathogenic | [21], [48] |
| c.971G>A | p.Trp324Ter | Likely pathogenic | [8] |
| Exon 11 | c.1024C>T | p.Arg342Ter | Pathogenic | [24] |
| c.1066_1067del | p.Leu356fsTer8 | Pathogenic | [12] |
| c.1148_1149del | p.Glu383AspfsTer9 | Likely pathogenic | [21] |
| Intron 11 | c.997–2 A>G | p.? | Likely pathogenic | [30] |
| Exon 12 | c.1140_1162del | p.Leu381ThrfsTer4 | Likely pathogenic | [65] |
| c.1142T>G | p.Leu381Arg | VUS/Likely pathogenic | [37] |
| c.1144_1147delTCTG | p. Ser382ArgfsTer33 | Pathogenic | [48] |
| c.1159C>T | p.Gln387Ter | Pathogenic | [20], [22], [78] |
| c.1186insC | p. Glu398ArgfsTer28 | Likely pathogenic | [21] |
| Exon 13 | c.1226_1229del | p.Glu409ValfsTer6 | Likely pathogenic | [21] |
| Exon 14 | c.1261_1262insG | p.Val421GlyfsTer5 | Likely pathogenic | [26] |
| c.1264_1273del | p.Gln422AsnfsTer126 | Pathogenic | [49] |
| c.1273insA | p.Pro426ThrfsTer15 | Likely pathogenic | [21] |
| Intron 14 | c.1250-1G>A | p.? | Likely pathogenic | [12] |
| c.1331+1G>A | p.? | Pathogenic | [39], [44], [46], [47], [52], [79] |
| Exon 15 | c.1366C>T | p.Gln456Ter | Likely pathogenic | [42] |
| c.1368_1372del | p.Gln456fsTer38 | Likely pathogenic | [12] |
| c.1389delC | p.Phe464SerfsTer87 | Likely pathogenic | [24] |
| Exon 16 | c.1421G>A | p.Trp474Ter | VUS/Likely pathogenic | [21] |
| c.1432C>T | p.Arg478Ter | Pathogenic | [12] |
